# Supplementary material for: Heterotroph Interactions Alter Prochlorococcus Transcriptome Dynamics during Extended Periods of Darkness
Source: PubMed Central journal article supplement (PMC5974335; doi:10.1128/msystems.00040-18), 2018-05-29

# A 13:11 light:dark diel

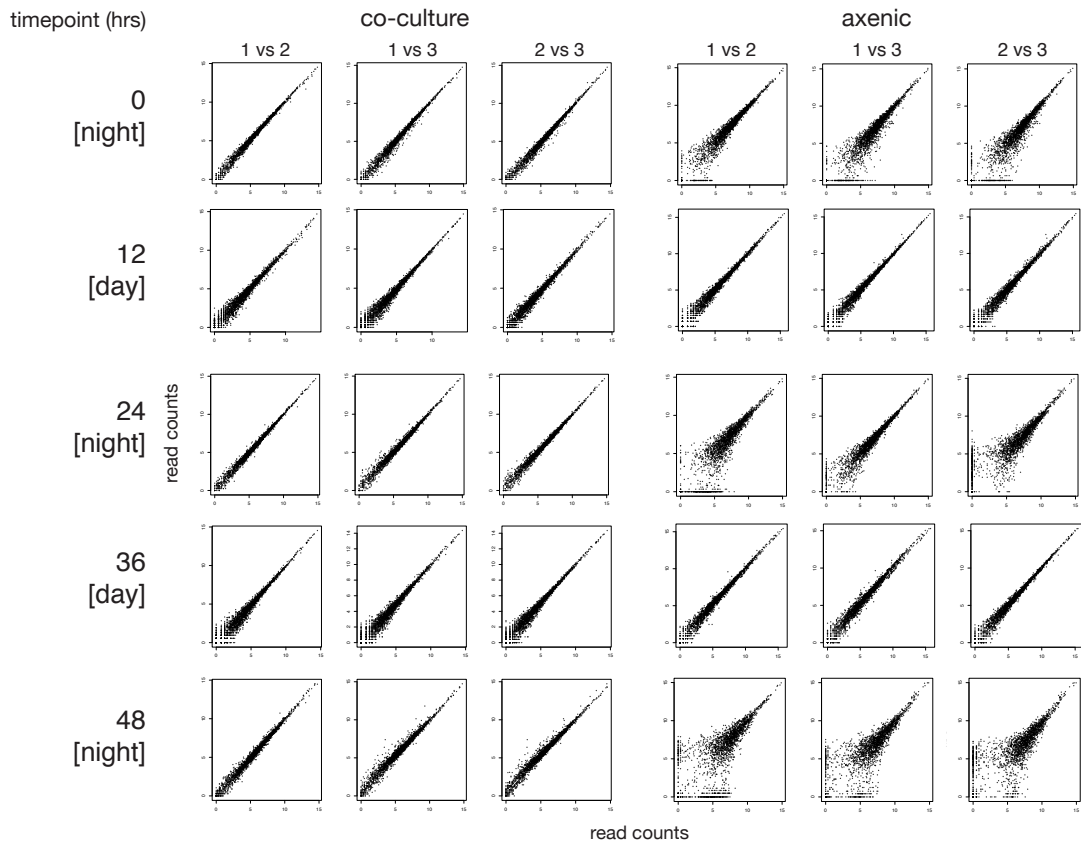

# B extended darkness

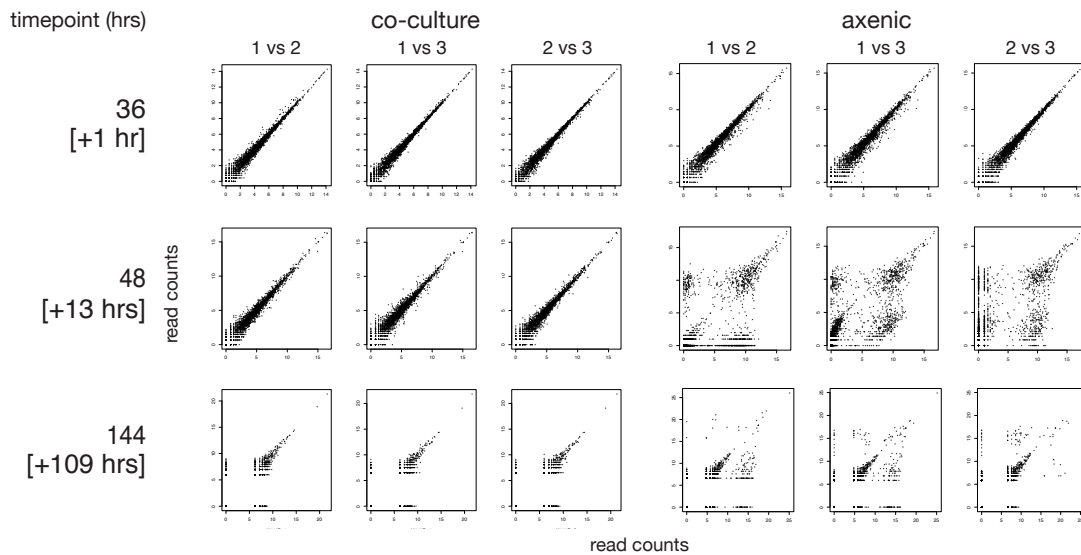

Supplement: sys003182233sf2.pdf [file sys003182233sf2.pdf]
