# Supplementary material for: Heterotroph Interactions Alter Prochlorococcus Transcriptome Dynamics during Extended Periods of Darkness
Source: PubMed Central journal article supplement (PMC5974335; doi:10.1128/msystems.00040-18), 2018-05-29
Supplement: sys003182233sf3.pdf [file sys003182233sf3.pdf]

13:11 light:dark diel

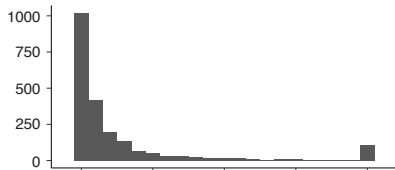

extended darkness

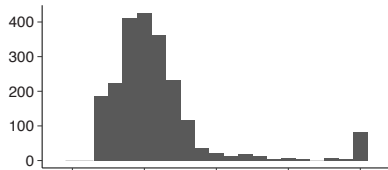

*Prochlorococcus*  
alone

frequency

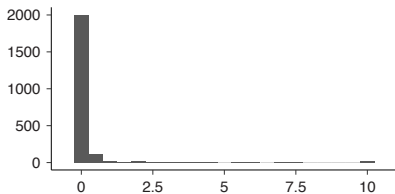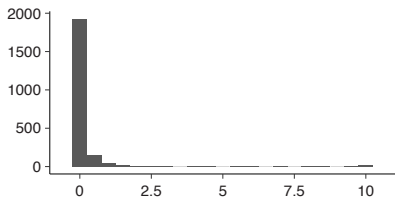

*Prochlorococcus*  
with *Alteromonas*

gene-wise dispersion
