# Supplementary material for: Heterotroph Interactions Alter Prochlorococcus Transcriptome Dynamics during Extended Periods of Darkness
Source: PubMed Central journal article supplement (PMC5974335; doi:10.1128/msystems.00040-18), 2018-05-29
Supplement: sys003182233sf4.pdf [file sys003182233sf4.pdf]

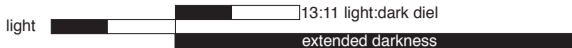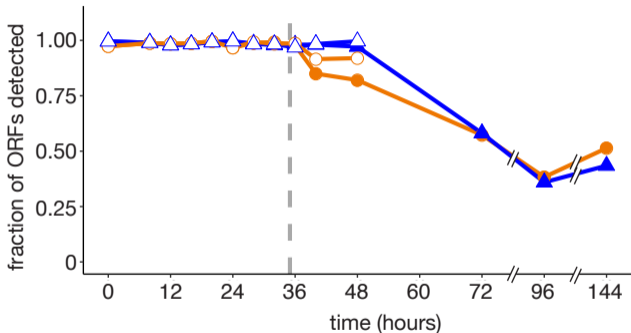

- Prochlorococcus* alone, 13:11 light:dark diel
- Prochlorococcus* with *Alteromonas*, 13:11 light:dark diel
- Prochlorococcus* alone, extended darkness
- Prochlorococcus* with *Alteromonas*, extended darkness
